# Supplementary material
Source: Springer Nature journal article supplement (https://www.springermedizin.de/resource/supplementary/13052_2013_299_MOESM1_ESM.pdf/9671816)

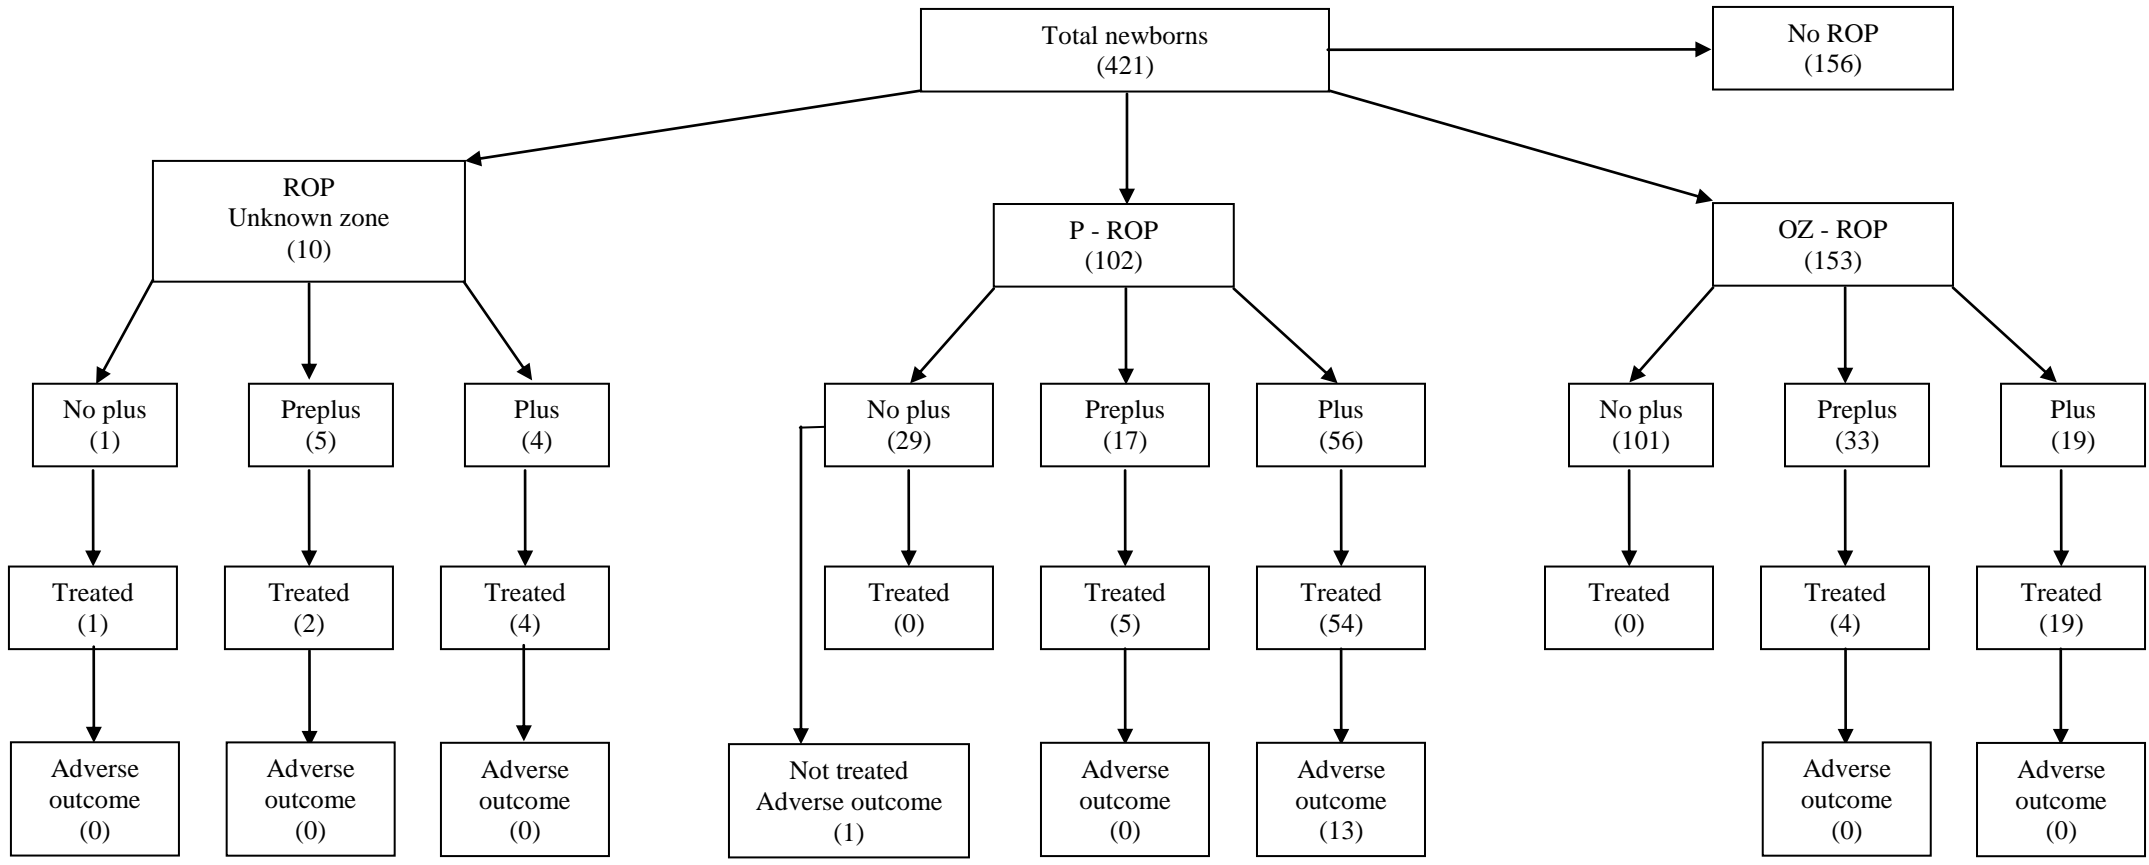

Supplement: MOESM1 [file 9671816]
